# Supplementary material for: Analysis of Factors Associated with the Risk of Suicide in a Brazilian Capital: Cross-Sectional Study
Source: MDPI journal article supplement (doi:10.3390/ijerph19010373), 2021-12-30
Supplement: s1 [file s1]

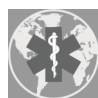

## Supplementary Materials

**Tabela S1: Description of suicide attempt, suicide and deaths by undetermined intent according to the International Statistical Classification of Diseases and Related Health Problems (ICD-10).**

| ICD-10                        | Description                                                                                                                                           |
|-------------------------------|-------------------------------------------------------------------------------------------------------------------------------------------------------|
| Suicide attempt and suicide   |                                                                                                                                                       |
| X60                           | Intentional self-poisoning by and exposure to nonopioid analgesics, antipyretics and antirheumatics                                                   |
| X61                           | Intentional self-poisoning by and exposure to antiepileptic, sedative-hypnotic, antiparkinsonism and psychotropic drugs, not elsewhere classified     |
| X62                           | Intentional self-poisoning by and exposure to narcotics and psychodysleptics [hallucinogens], not elsewhere classified                                |
| X63                           | Intentional self-poisoning by and exposure to other drugs acting on the autonomic nervous system                                                      |
| X64                           | Intentional self-poisoning by and exposure to other and unspecified drugs, medicaments and biological substances                                      |
| X65                           | Intentional self-poisoning by and exposure to alcohol                                                                                                 |
| X66                           | Intentional self-poisoning by and exposure to organic solvents and halogenated hydrocarbons and their vapours                                         |
| X67                           | Intentional self-poisoning by and exposure to carbon monoxide and other gases and vapours                                                             |
| X68                           | Intentional self-poisoning by and exposure to pesticides                                                                                              |
| X69                           | Intentional self-poisoning by and exposure to other and unspecified chemicals and noxious substances                                                  |
| X70                           | Intentional self-harm by hanging, strangulation and suffocation                                                                                       |
| X71                           | Intentional self-harm by drowning and submersion                                                                                                      |
| X72                           | Intentional self-harm by handgun discharge                                                                                                            |
| X73                           | Intentional self-harm by rifle, shotgun and larger firearm discharge                                                                                  |
| X74                           | Intentional self-harm by other and unspecified firearm discharge                                                                                      |
| X75                           | Intentional self-harm by explosive material                                                                                                           |
| X76                           | Intentional self-harm by smoke, fire and flames                                                                                                       |
| X77                           | Intentional self-harm by steam, hot vapours and hot objects                                                                                           |
| X78                           | Intentional self-harm by sharp object                                                                                                                 |
| X79                           | Intentional self-harm by blunt object                                                                                                                 |
| X80                           | Intentional self-harm by jumping from a high place                                                                                                    |
| X81                           | Intentional self-harm by jumping or lying before moving object                                                                                        |
| X82                           | Intentional self-harm by crashing of motor vehicle                                                                                                    |
| X83                           | Intentional self-harm by other specified means                                                                                                        |
| X84                           | Intentional self-harm by unspecified means                                                                                                            |
| Deaths by undetermined intent |                                                                                                                                                       |
| Y10                           | Poisoning by and exposure to nonopioid analgesics, antipyretics and antirheumatics, undetermined intent                                               |
| Y11                           | Poisoning by and exposure to antiepileptic, sedative-hypnotic, antiparkinsonism and psychotropic drugs, not elsewhere classified, undetermined intent |
| Y12                           | Poisoning by and exposure to narcotics and psychodysleptics [hallucinogens], not elsewhere classified, undetermined intent                            |
| Y13                           | Poisoning by and exposure to other drugs acting on the autonomic nervous system, undetermined intent                                                  |
| Y14                           | Poisoning by and exposure to other and unspecified drugs, medicaments and                                                                             |

---

|     |                                                                                                                   |
|-----|-------------------------------------------------------------------------------------------------------------------|
|     | biological substances, undetermined intent                                                                        |
| Y15 | Poisoning by and exposure to alcohol, undetermined intent                                                         |
| Y16 | Poisoning by and exposure to organic solvents and halogenated hydrocarbons and their vapours, undetermined intent |
| Y17 | Poisoning by and exposure to carbon monoxide and other gases and vapours, undetermined intent                     |
| Y18 | Poisoning by and exposure to pesticides, undetermined intent                                                      |
| Y19 | Poisoning by and exposure to other and unspecified chemicals and noxious substances, undetermined intent          |
| Y20 | Hanging, strangulation and suffocation, undetermined intent                                                       |
| Y21 | Drowning and submersion, undetermined intent                                                                      |
| Y22 | Handgun discharge, undetermined intent                                                                            |
| Y23 | Rifle, shotgun and larger firearm discharge, undetermined intent                                                  |
| Y24 | Other and unspecified firearm discharge, undetermined intent                                                      |
| Y25 | Contact with explosive material, undetermined intent                                                              |
| Y26 | Exposure to smoke, fire and flames, undetermined intent                                                           |
| Y27 | Contact with steam, hot vapours and hot objects, undetermined intent                                              |
| Y28 | Contact with sharp object, undetermined intent                                                                    |
| Y29 | Contact with blunt object, undetermined intent                                                                    |
| Y30 | Falling, jumping or pushed from a high place, undetermined intent                                                 |
| Y31 | Falling, lying or running before or into moving object, undetermined intent                                       |
| Y32 | Crashing of motor vehicle, undetermined intent                                                                    |
| Y33 | Other specified events, undetermined intent                                                                       |
| Y34 | Unspecified event, undetermined intent                                                                            |

---
